# Supplementary figures and images for: Chemoenzymatic synthesis of the carbasugars carba-β-l-galactopyranose, carba-β-l-talopyranose and carba-α-l-talopyranose from methyl benzoate
Source: Royal Society of Chemistry journal article supplement (doi:10.1039/b921545j), 2010-01-01

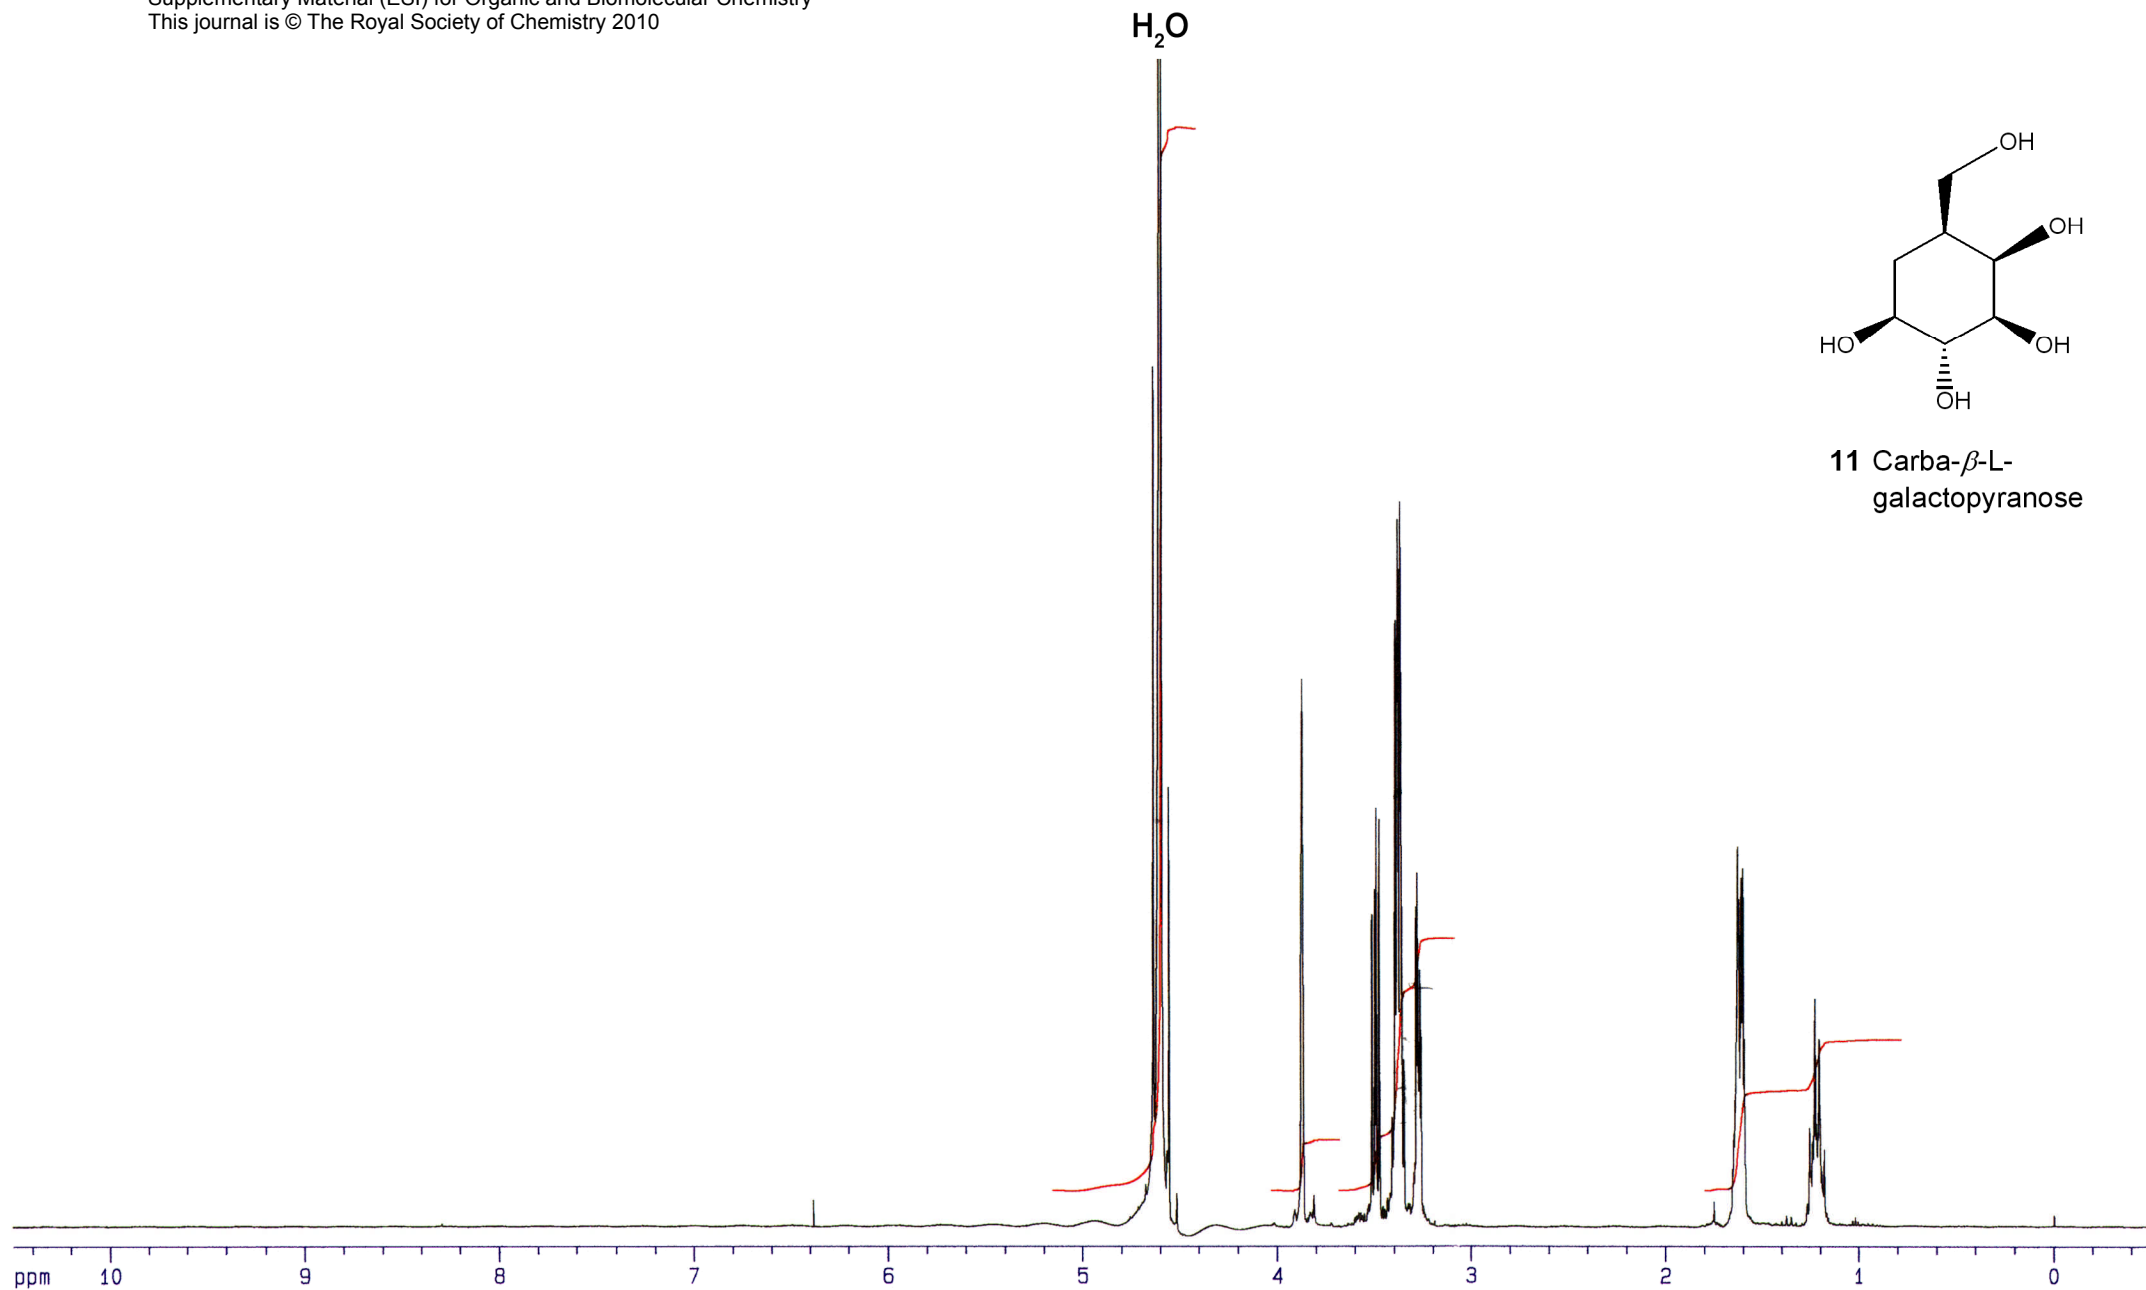

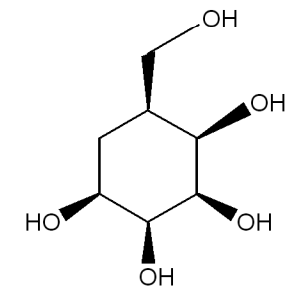

**18** Carba-β-L-talopyranose

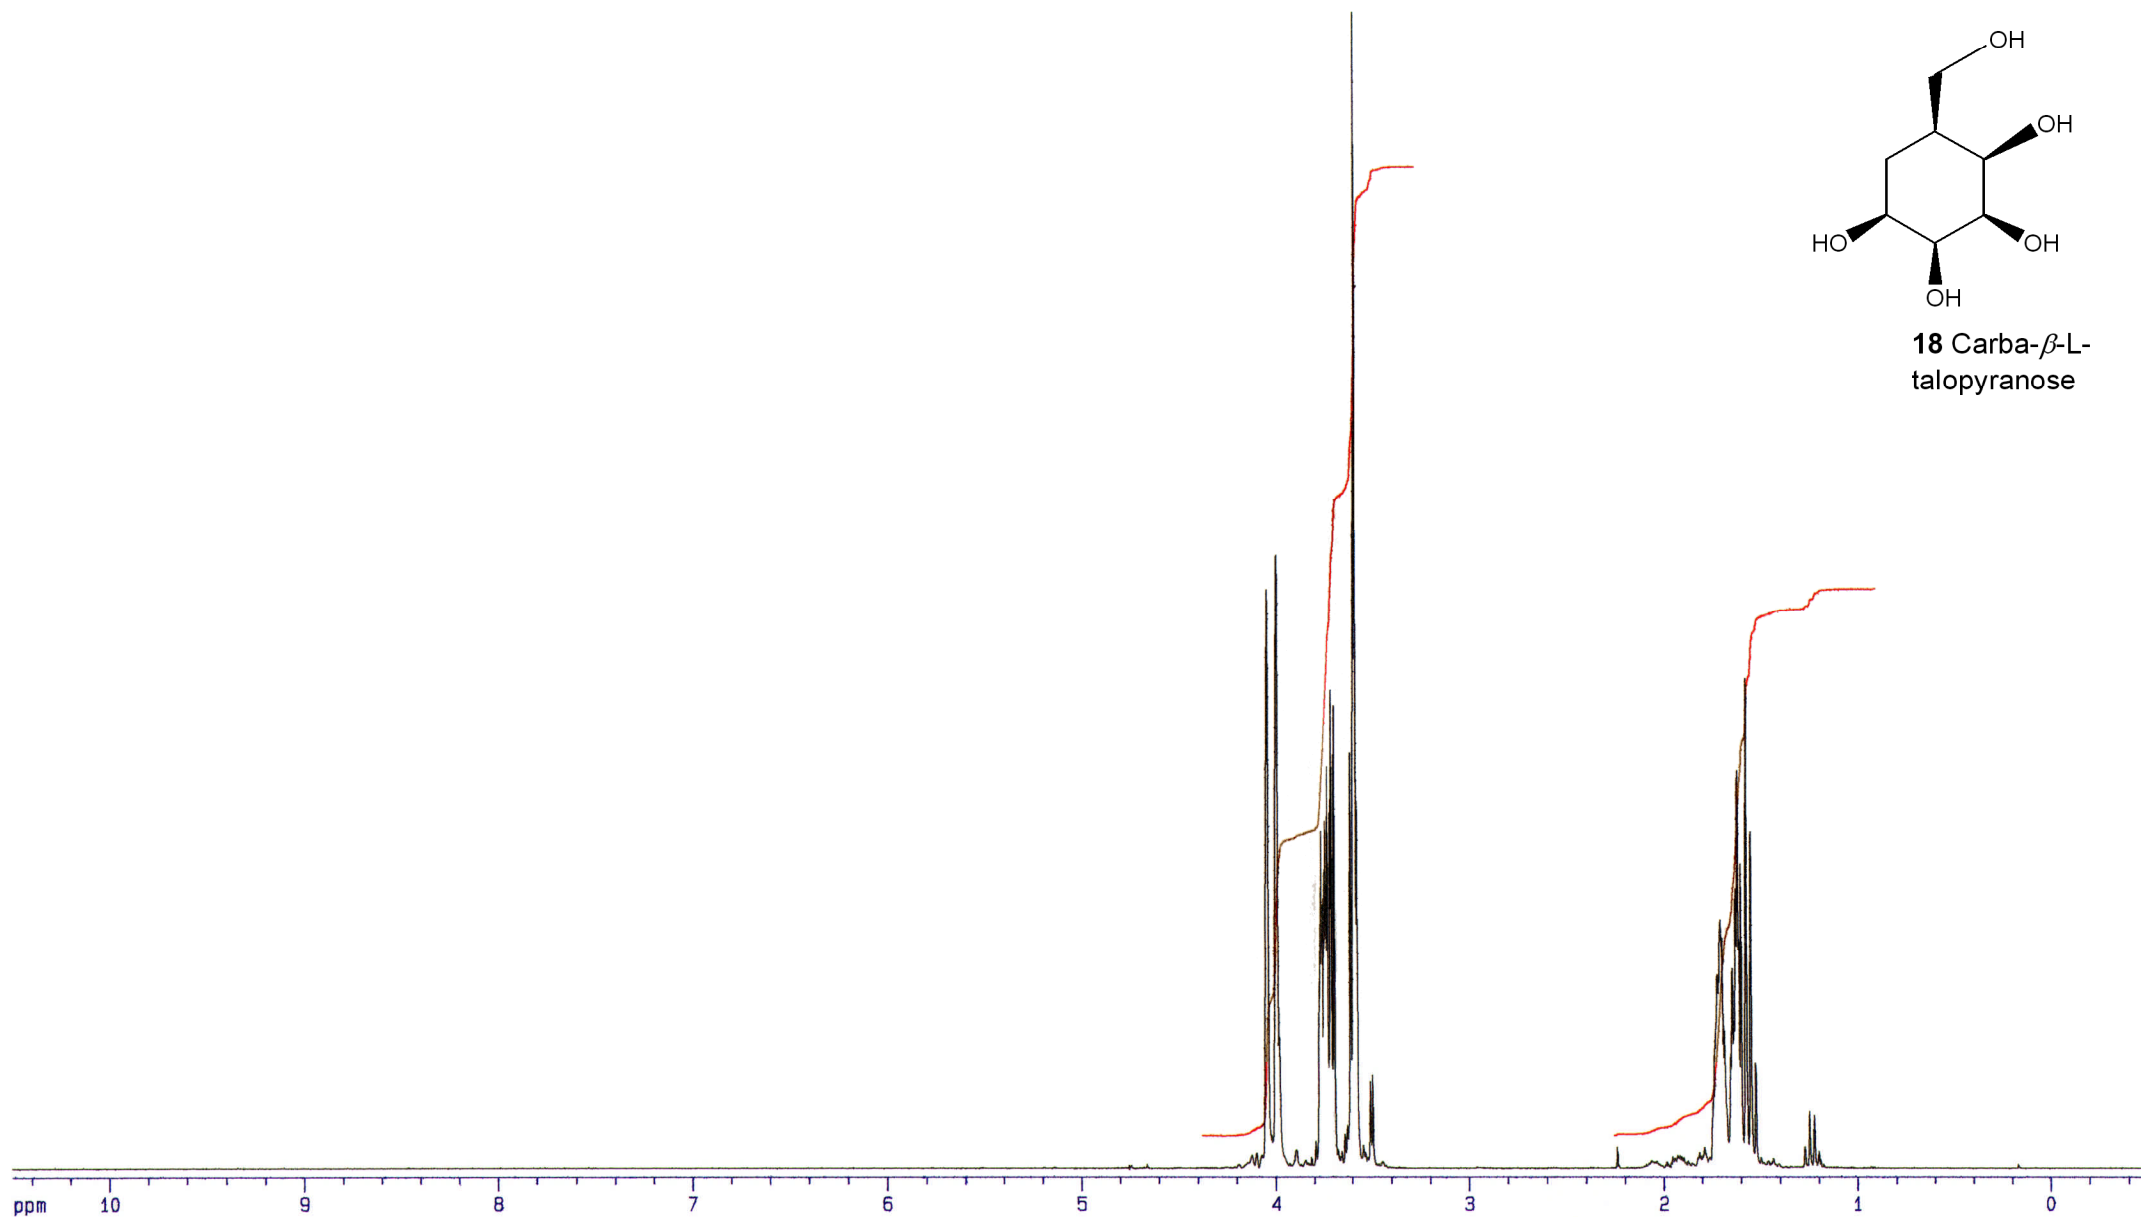

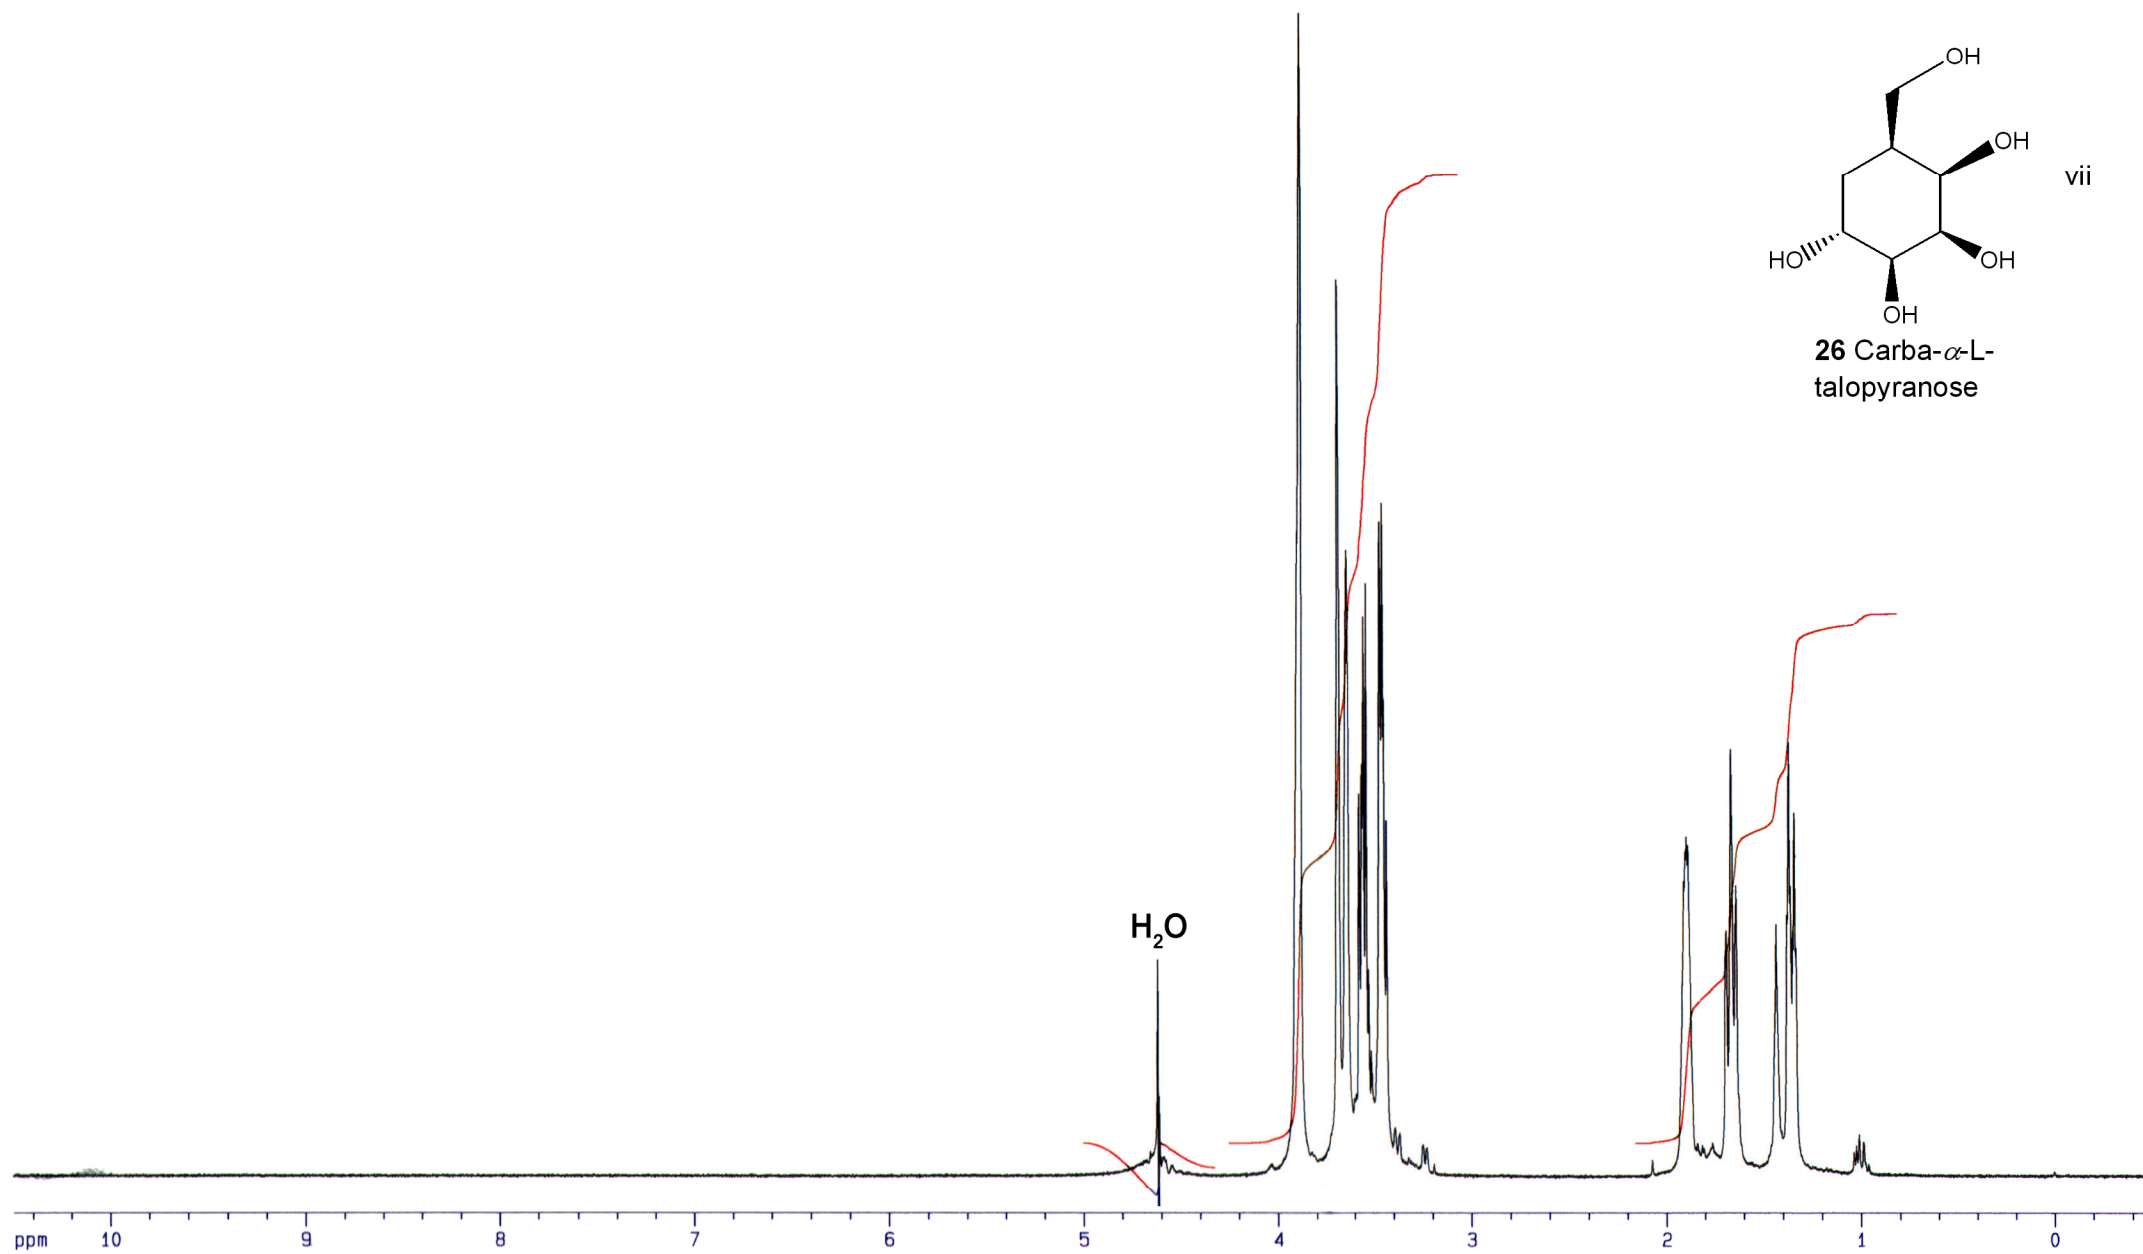

Supplement: b921545j.pdf [file b921545j.pdf]
